# Supplementary material for: First structural example of a metal uncoordinated mesoionic imidazo[1,5-a]pyridine and its precursor intermediate copper complex: an insight to the catalytic cycle
Source: Royal Society of Chemistry journal article supplement (doi:10.1039/c1dt11435b), 2011-01-01
Supplement: c1dt11435b.pdf [file c1dt11435b.pdf]

## Supporting Information

### **First Structural Example of a Metal Un-coordinated Mesoionic Imidazo[1,5-a]pyridine and Its Precursor Intermediate Copper Complex: An Insight to The Catalytic Cycle**

Suprakash Roy<sup>a)</sup>, Saleem Javed<sup>b)</sup>, Marilyn M. Olmstead<sup>c)</sup>, Apurba K. Patra<sup>\*a)</sup>

*<sup>a)</sup>Department of Chemistry, National Institute of Technology Durgapur, Mahatma Gandhi Avenue, Durgapur 713 209, India*

*<sup>b)</sup>Department of Chemistry, Indian Institute of Technology, Kanpur 208 016, India*

*<sup>c)</sup> Department of Chemistry, University of California Davis, CA 95616 (USA)*

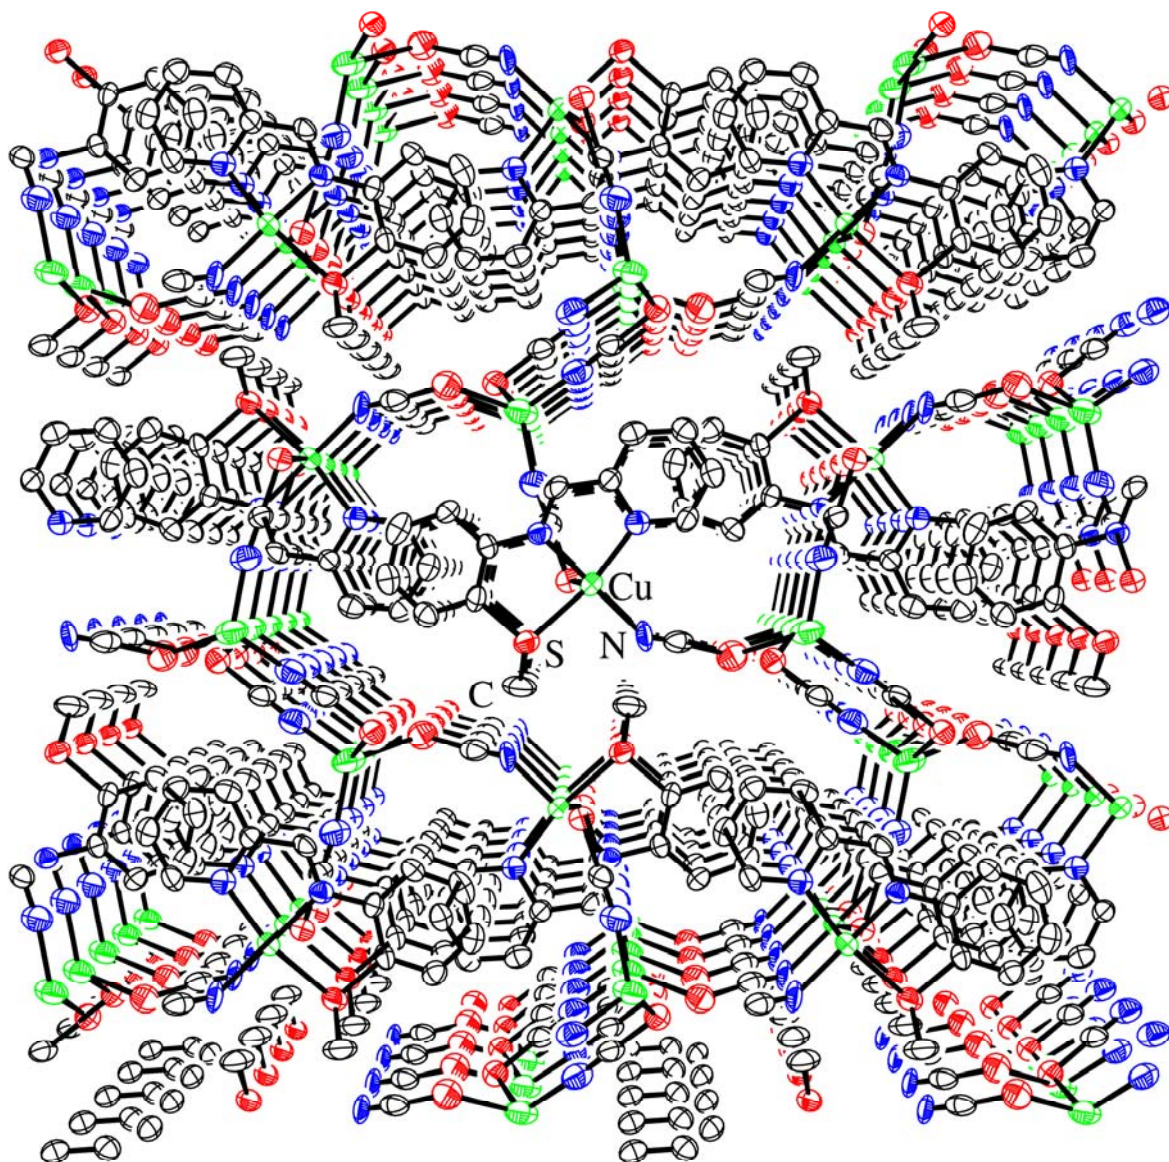

**Fig. S1** ORTEP diagram of 3-dimensional network of  $[(L^1)Cu_2(SCN)_3]_n$  (**1**) shown normal to 'a' axis (green: Cu, red: S, black: C, blue:N)

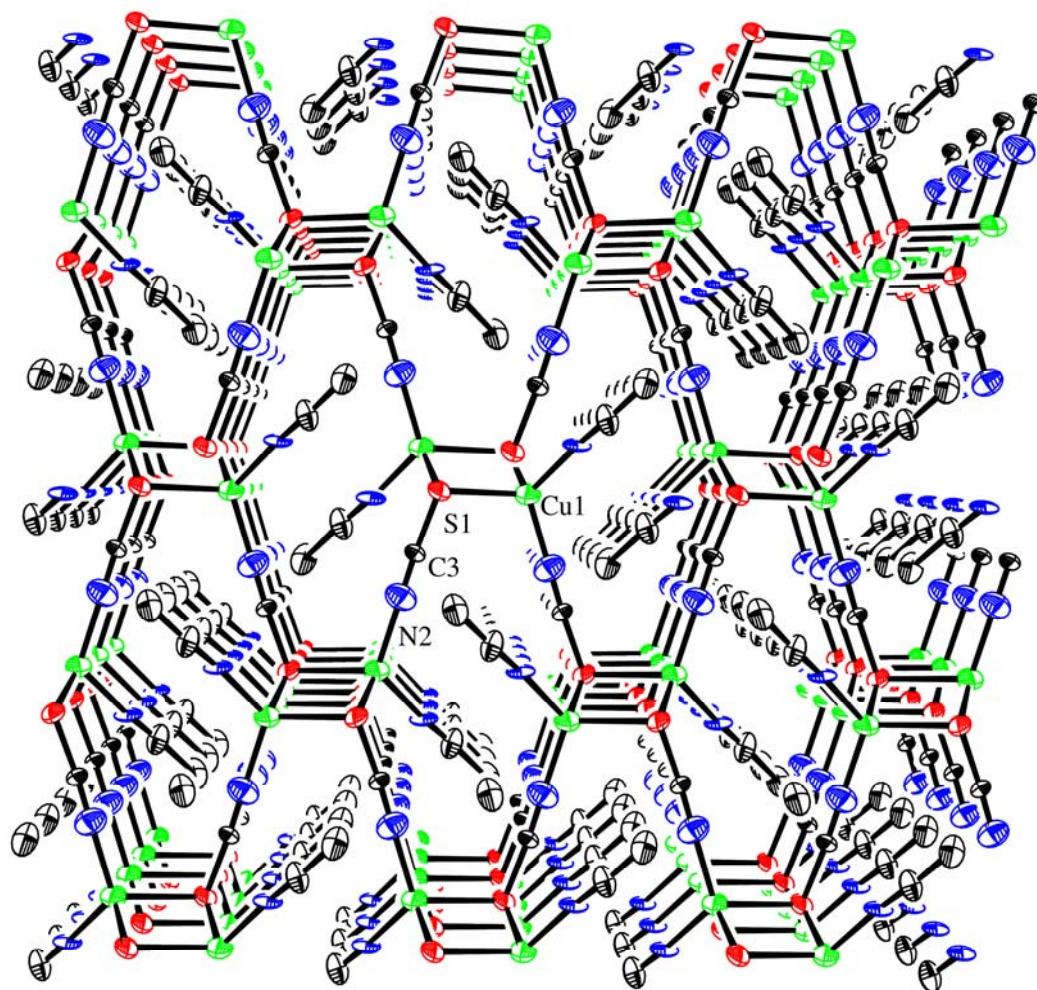

**Fig. S2.** ORTEP diagram of the polymeric 3-D network of **3**, Cu: green, N: blue, C: black, S: red; view normal to 'a' axis, 30% ellipsoid

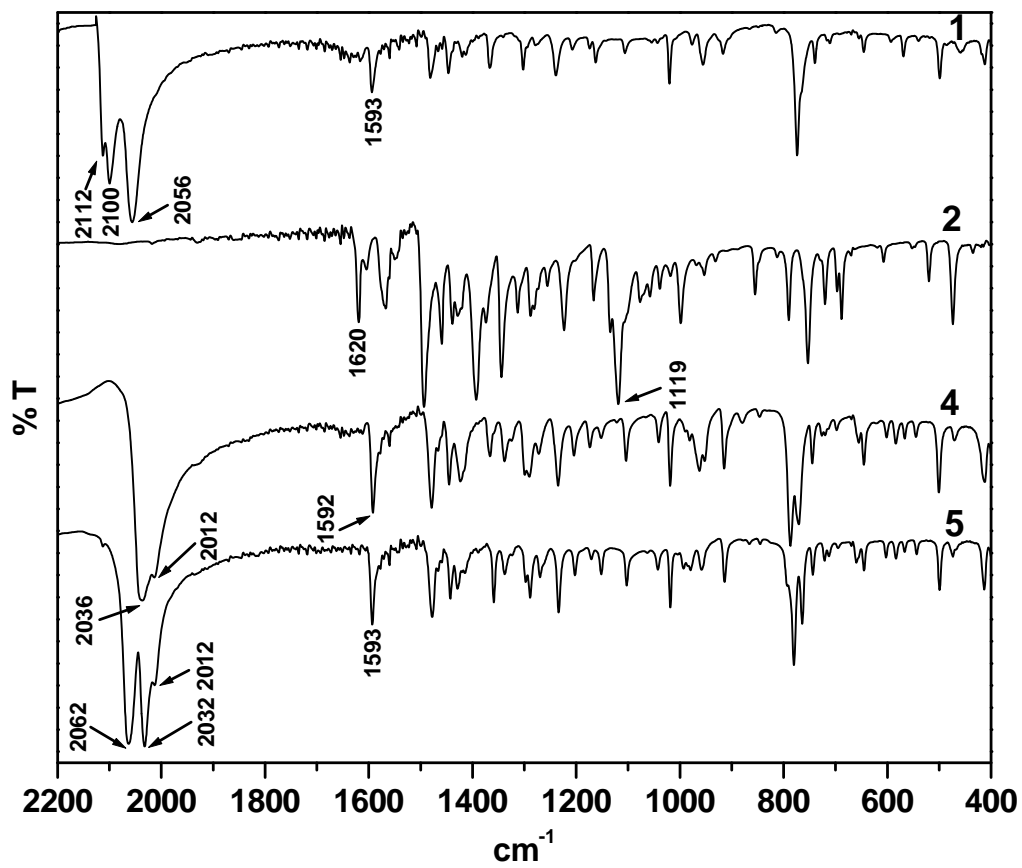

**Fig. S3.** FT-IR spectra of **1**, **2**, **4** and **5** (KBr disk)

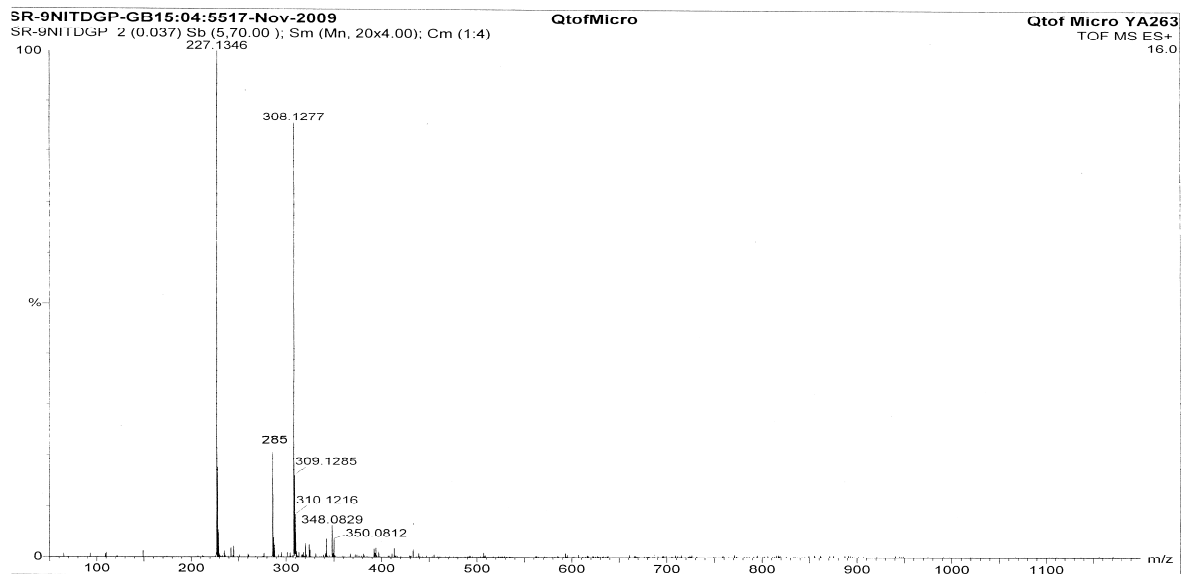

**Fig. S4:** Mass spectrum of **2**

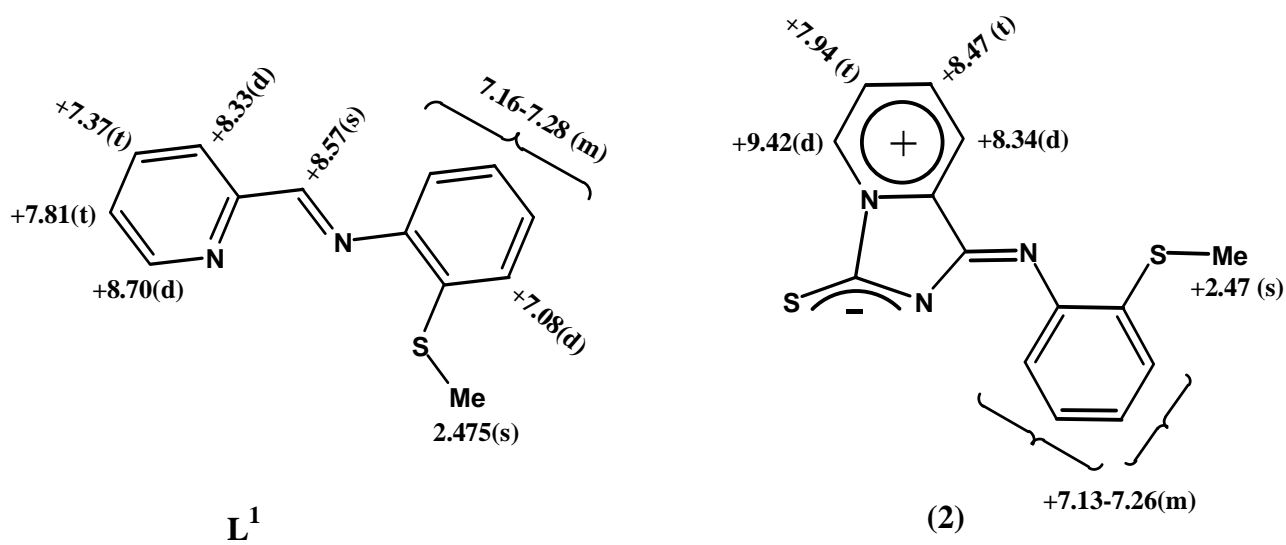

**Fig. S5:**  $^1\text{H}$  NMR shifts of **2** compared to  $L^1$ ,  $\delta$  values are shown on their corresponding positions.

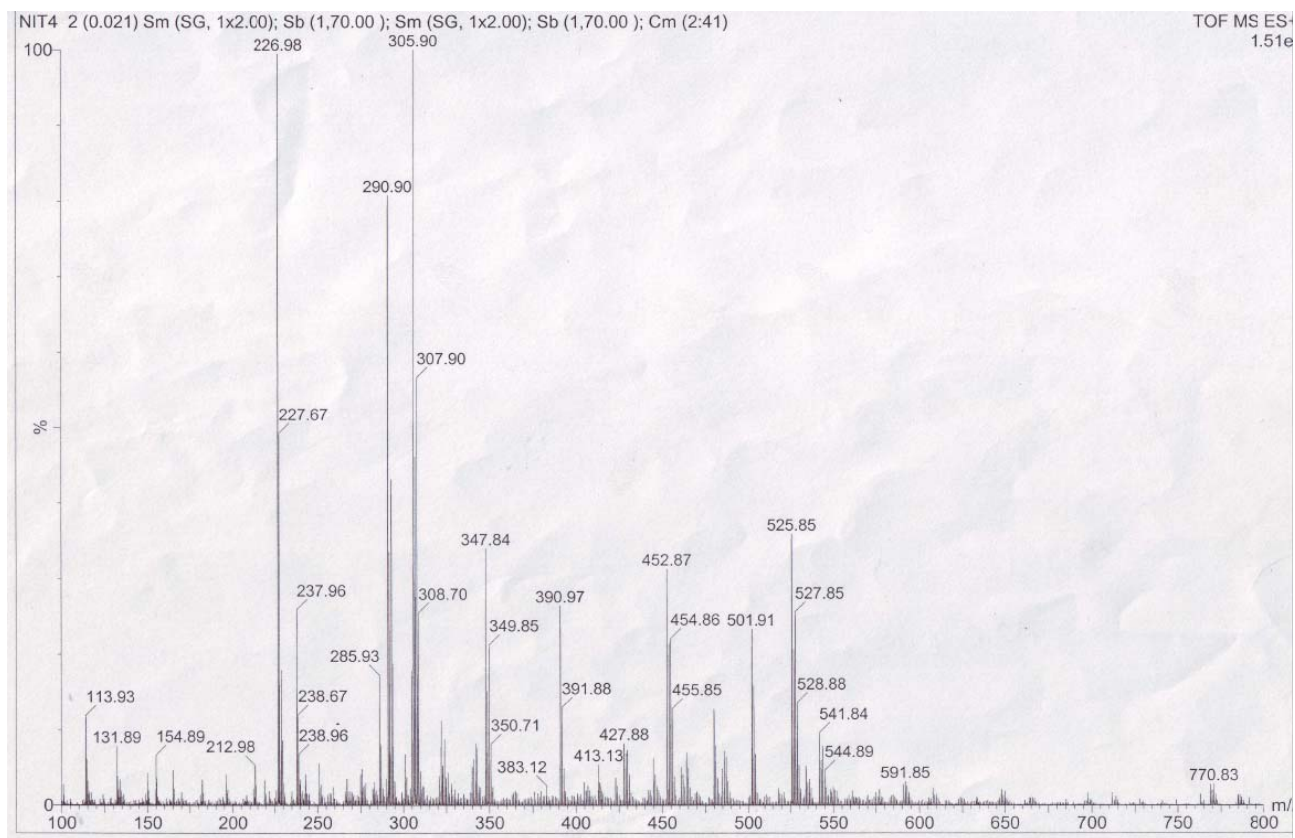

**Fig. S6:** Mass spectrum of the aliquot taken during the course of the reaction

$L^1 = C_{13}H_{12}N_2S = 228$ ,  $2 + 1H^+ = 286$ ,  $L^1 + Cu = 291$ ,  $2 + Na^+ = 308$ ,  $L^1 + Cu + Cl^- = 326$ ,  $2 + Cu = 348$ ,  $(L^1 + Cu + SCN + MeCN) + 1H^+ = 391$ ,  $L^1 + 2Cu + SCN + MeCN = 453$ ,  $L^1 + Cu^{II} + \mu_2-SCN + \mu_2-Cl + Cu^I + Cl + MeCN + 1H^+ = 526$

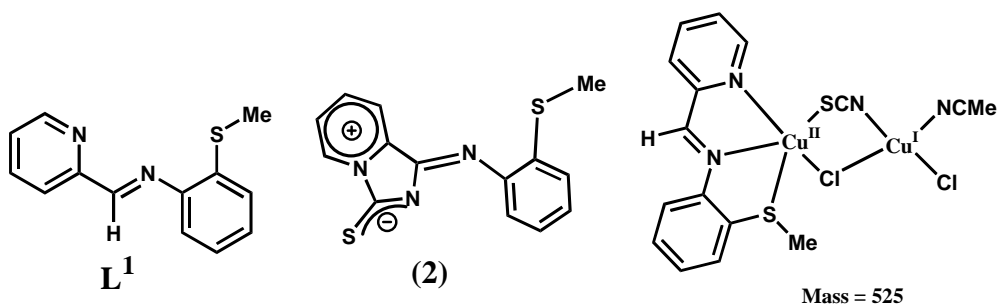

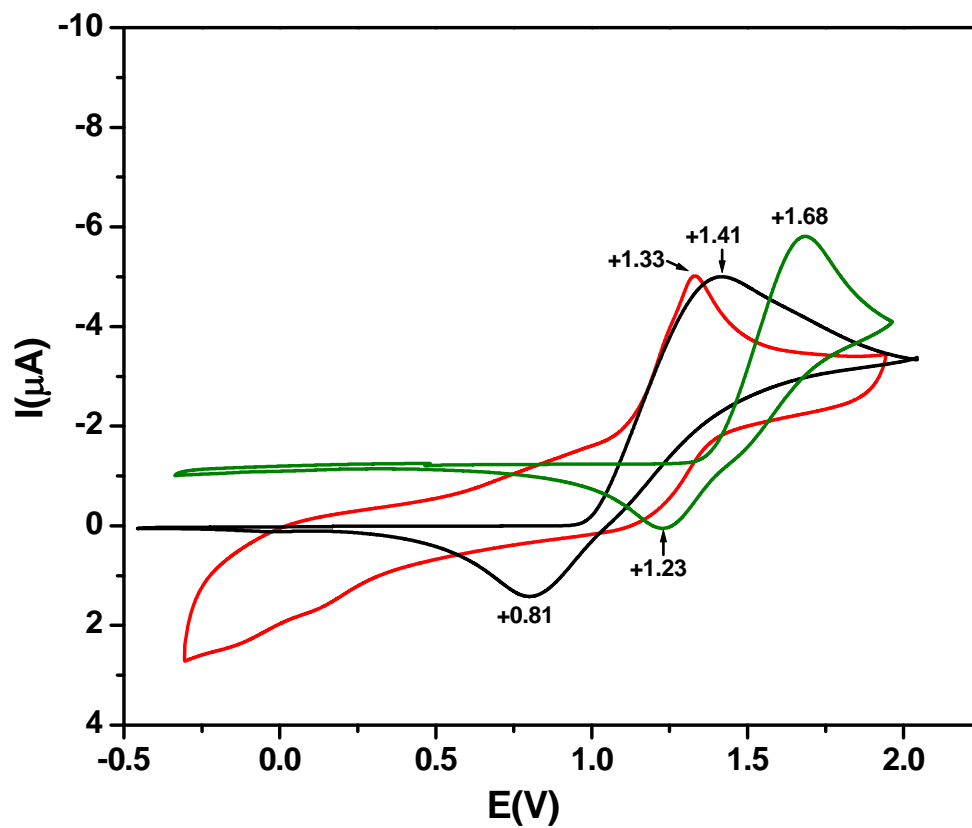

**Fig. S7.** Cyclic voltammogram (scan rate 50 mV/s) of LiCl (green trace), KSCN (black trace) and NaN<sub>3</sub> (red trace) measured in MeCN solution of 0.1 M TBAP, using platinum as working electrode. Potentials are vs NHE.



**Table S1.** Crystal data and structure refinement for  $[(L^1)Cu_2(SCN)_3]_n$  (**1**)

|                                   |                                                                               |                       |
|-----------------------------------|-------------------------------------------------------------------------------|-----------------------|
| Identification code               | sr8                                                                           |                       |
| Empirical formula                 | C <sub>16</sub> H <sub>12</sub> Cu <sub>2</sub> N <sub>5</sub> S <sub>4</sub> |                       |
| Formula weight                    | 529.63                                                                        |                       |
| Temperature                       | 293(2) K                                                                      |                       |
| Wavelength                        | 0.71073 Å                                                                     |                       |
| Crystal system                    | Orthorhombic                                                                  |                       |
| Space group                       | P 21 21 21                                                                    |                       |
| Unit cell dimensions              | a = 6.7778(3) Å                                                               | $\alpha = 90^\circ$ . |
|                                   | b = 15.2422(8) Å                                                              | $\beta = 90^\circ$ .  |
|                                   | c = 18.9036(9) Å                                                              | $\gamma = 90^\circ$ . |
| Volume                            | 1952.90(16) Å <sup>3</sup>                                                    |                       |
| Z                                 | 4                                                                             |                       |
| Density (calculated)              | 1.801 Mg/m <sup>3</sup>                                                       |                       |
| Absorption coefficient            | 2.617 mm <sup>-1</sup>                                                        |                       |
| F(000)                            | 1060                                                                          |                       |
| Crystal size                      | 0.25 x 0.20 x 0.18 mm <sup>3</sup>                                            |                       |
| Theta range for data collection   | 1.72 to 23.29°                                                                |                       |
| Index ranges                      | -7 ≤ h ≤ 7, -16 ≤ k ≤ 16, -21 ≤ l ≤ 21                                        |                       |
| Reflections collected             | 19783                                                                         |                       |
| Independent reflections           | 2816 [R(int) = 0.0692]                                                        |                       |
| Completeness to theta = 23.29°    | 99.8 %                                                                        |                       |
| Refinement method                 | Full-matrix least-squares on F <sup>2</sup>                                   |                       |
| Data / restraints / parameters    | 2816 / 0 / 245                                                                |                       |
| Goodness-of-fit on F <sup>2</sup> | 1.085                                                                         |                       |
| Final R indices [I > 2σ(I)]       | R1 = 0.0506, wR2 = 0.1184                                                     |                       |
| R indices (all data)              | R1 = 0.0604, wR2 = 0.1249                                                     |                       |
| Absolute structure parameter      | 0.53(3)                                                                       |                       |
| Largest diff. peak and hole       | 1.574 and -0.791 e.Å <sup>-3</sup>                                            |                       |

**Table S2.** Atomic coordinates ( $\times 10^4$ ) and equivalent isotropic displacement parameters ( $\text{\AA}^2 \times 10^3$ ) for  $[(L^1)\text{Cu}_2(\text{SCN})_3]_n$  (**1**).  $U(\text{eq})$  is defined as one third of the trace of the orthogonalized  $U^{ij}$  tensor.

|       | x         | y        | z       | U(eq) |
|-------|-----------|----------|---------|-------|
| Cu(1) | 2159(2)   | 7791(1)  | 6602(1) | 44(1) |
| Cu(2) | 2031(2)   | 11541(1) | 5937(1) | 69(1) |
| S(1)  | 3094(4)   | 6674(1)  | 5800(1) | 47(1) |
| S(2)  | -1745(4)  | 7376(1)  | 6645(1) | 48(1) |
| S(3)  | -75(4)    | 10258(2) | 5593(1) | 66(1) |
| S(4)  | 5020(4)   | 11054(2) | 5492(1) | 51(1) |
| N(1)  | 2456(10)  | 8590(4)  | 7458(3) | 41(2) |
| N(2)  | 2737(10)  | 6894(4)  | 7311(3) | 39(2) |
| N(3)  | -1945(13) | 6787(5)  | 8035(4) | 63(2) |
| N(4)  | 1842(14)  | 8711(5)  | 5881(4) | 57(2) |
| N(5)  | 6059(13)  | 12464(6) | 4617(4) | 62(2) |
| C(1)  | 2287(13)  | 9457(5)  | 7509(4) | 44(2) |
| C(2)  | 2371(12)  | 9890(5)  | 8159(4) | 46(2) |
| C(3)  | 2654(13)  | 9409(5)  | 8756(4) | 48(2) |
| C(4)  | 2823(13)  | 8515(6)  | 8714(4) | 46(2) |
| C(5)  | 2740(13)  | 8115(5)  | 8061(4) | 39(2) |
| C(6)  | 2880(13)  | 7185(5)  | 7951(4) | 40(2) |
| C(7)  | 2779(12)  | 5991(5)  | 7132(4) | 35(2) |
| C(8)  | 2694(13)  | 5305(5)  | 7615(4) | 43(2) |
| C(9)  | 2563(12)  | 4457(6)  | 7374(5) | 52(2) |
| C(10) | 2515(13)  | 4268(5)  | 6673(5) | 53(2) |
| C(11) | 2612(12)  | 4928(5)  | 6187(4) | 45(2) |
| C(12) | 2770(13)  | 5794(4)  | 6408(4) | 38(2) |
| C(13) | 1115(17)  | 6532(7)  | 5168(5) | 68(3) |
| C(14) | -1880(13) | 7043(5)  | 7458(4) | 42(2) |
| C(15) | 1147(15)  | 9313(7)  | 5795(5) | 55(3) |
| C(16) | 5649(15)  | 11871(6) | 4982(4) | 50(2) |

**Table S3.** Bond lengths [Å] and angles [°] for [(L<sup>1</sup>)Cu<sub>2</sub>(SCN)<sub>3</sub>]<sub>n</sub> (**1**)

|                 |           |
|-----------------|-----------|
| Cu(1)-N(2)      | 1.956(6)  |
| Cu(1)-N(4)      | 1.966(8)  |
| Cu(1)-N(1)      | 2.035(6)  |
| Cu(1)-S(1)      | 2.367(2)  |
| Cu(1)-S(2)      | 2.722(3)  |
| Cu(2)-N(5)#1    | 1.958(9)  |
| Cu(2)-N(3)#2    | 1.981(8)  |
| Cu(2)-S(4)      | 2.315(3)  |
| Cu(2)-S(3)      | 2.506(3)  |
| S(1)-C(12)      | 1.780(7)  |
| S(1)-C(13)      | 1.809(10) |
| S(2)-C(14)      | 1.622(9)  |
| S(3)-C(15)      | 1.705(12) |
| S(4)-C(16)      | 1.632(10) |
| N(1)-C(1)       | 1.331(10) |
| N(1)-C(5)       | 1.365(9)  |
| N(2)-C(6)       | 1.291(9)  |
| N(2)-C(7)       | 1.417(9)  |
| N(3)-C(14)      | 1.158(10) |
| N(3)-Cu(2)#3    | 1.981(8)  |
| N(4)-C(15)      | 1.044(11) |
| N(5)-C(16)      | 1.170(11) |
| N(5)-Cu(2)#4    | 1.958(9)  |
| C(1)-C(2)       | 1.396(11) |
| C(1)-H(1)       | 0.9300    |
| C(2)-C(3)       | 1.359(11) |
| C(2)-H(2)       | 0.9300    |
| C(3)-C(4)       | 1.370(11) |
| C(3)-H(3)       | 0.9300    |
| C(4)-C(5)       | 1.377(11) |
| C(4)-H(4)       | 0.9300    |
| C(5)-C(6)       | 1.437(10) |
| C(6)-H(6)       | 0.9300    |
| C(7)-C(8)       | 1.389(10) |
| C(7)-C(12)      | 1.401(11) |
| C(8)-C(9)       | 1.373(12) |
| C(8)-H(8)       | 0.9300    |
| C(9)-C(10)      | 1.356(13) |
| C(9)-H(9)       | 0.9300    |
| C(10)-C(11)     | 1.365(12) |
| C(10)-H(10)     | 0.9300    |
| C(11)-C(12)     | 1.389(11) |
| C(11)-H(11)     | 0.9300    |
| C(13)-H(13A)    | 0.9600    |
| C(13)-H(13B)    | 0.9600    |
| C(13)-H(13C)    | 0.9600    |
| N(2)-Cu(1)-N(4) | 174.7(3)  |
| N(2)-Cu(1)-N(1) | 81.6(2)   |
| N(4)-Cu(1)-N(1) | 97.8(3)   |
| N(2)-Cu(1)-S(1) | 83.22(18) |

|                     |            |
|---------------------|------------|
| N(4)-Cu(1)-S(1)     | 95.7(2)    |
| N(1)-Cu(1)-S(1)     | 156.0(2)   |
| N(2)-Cu(1)-S(2)     | 90.7(2)    |
| N(4)-Cu(1)-S(2)     | 94.6(3)    |
| N(1)-Cu(1)-S(2)     | 102.18(19) |
| S(1)-Cu(1)-S(2)     | 96.46(8)   |
| N(5)#1-Cu(2)-N(3)#2 | 111.6(3)   |
| N(5)#1-Cu(2)-S(4)   | 110.4(3)   |
| N(3)#2-Cu(2)-S(4)   | 116.3(3)   |
| N(5)#1-Cu(2)-S(3)   | 105.9(3)   |
| N(3)#2-Cu(2)-S(3)   | 112.7(3)   |
| S(4)-Cu(2)-S(3)     | 98.86(10)  |
| C(12)-S(1)-C(13)    | 104.2(5)   |
| C(12)-S(1)-Cu(1)    | 95.5(3)    |
| C(13)-S(1)-Cu(1)    | 108.1(3)   |
| C(14)-S(2)-Cu(1)    | 99.0(3)    |
| C(15)-S(3)-Cu(2)    | 108.9(3)   |
| C(16)-S(4)-Cu(2)    | 101.5(4)   |
| C(1)-N(1)-C(5)      | 118.6(7)   |
| C(1)-N(1)-Cu(1)     | 130.1(5)   |
| C(5)-N(1)-Cu(1)     | 111.2(5)   |
| C(6)-N(2)-C(7)      | 123.8(6)   |
| C(6)-N(2)-Cu(1)     | 114.6(5)   |
| C(7)-N(2)-Cu(1)     | 121.3(5)   |
| C(14)-N(3)-Cu(2)#3  | 171.3(7)   |
| C(15)-N(4)-Cu(1)    | 141.7(8)   |
| C(16)-N(5)-Cu(2)#4  | 173.5(8)   |
| N(1)-C(1)-C(2)      | 122.0(7)   |
| N(1)-C(1)-H(1)      | 119.0      |
| C(2)-C(1)-H(1)      | 119.0      |
| C(3)-C(2)-C(1)      | 118.9(7)   |
| C(3)-C(2)-H(2)      | 120.6      |
| C(1)-C(2)-H(2)      | 120.6      |
| C(2)-C(3)-C(4)      | 120.0(8)   |
| C(2)-C(3)-H(3)      | 120.0      |
| C(4)-C(3)-H(3)      | 120.0      |
| C(3)-C(4)-C(5)      | 119.3(8)   |
| C(3)-C(4)-H(4)      | 120.4      |
| C(5)-C(4)-H(4)      | 120.4      |
| N(1)-C(5)-C(4)      | 121.4(7)   |
| N(1)-C(5)-C(6)      | 114.3(7)   |
| C(4)-C(5)-C(6)      | 124.3(7)   |
| N(2)-C(6)-C(5)      | 118.0(7)   |
| N(2)-C(6)-H(6)      | 121.0      |
| C(5)-C(6)-H(6)      | 121.0      |
| C(8)-C(7)-C(12)     | 118.7(7)   |
| C(8)-C(7)-N(2)      | 124.9(7)   |
| C(12)-C(7)-N(2)     | 116.2(6)   |
| C(9)-C(8)-C(7)      | 119.6(8)   |
| C(9)-C(8)-H(8)      | 120.2      |
| C(7)-C(8)-H(8)      | 120.2      |
| C(10)-C(9)-C(8)     | 121.7(8)   |
| C(10)-C(9)-H(9)     | 119.1      |
| C(8)-C(9)-H(9)      | 119.1      |

|                     |           |
|---------------------|-----------|
| C(9)-C(10)-C(11)    | 120.0(8)  |
| C(9)-C(10)-H(10)    | 120.0     |
| C(11)-C(10)-H(10)   | 120.0     |
| C(10)-C(11)-C(12)   | 120.1(8)  |
| C(10)-C(11)-H(11)   | 120.0     |
| C(12)-C(11)-H(11)   | 120.0     |
| C(11)-C(12)-C(7)    | 119.9(7)  |
| C(11)-C(12)-S(1)    | 122.1(6)  |
| C(7)-C(12)-S(1)     | 117.9(5)  |
| S(1)-C(13)-H(13A)   | 109.5     |
| S(1)-C(13)-H(13B)   | 109.5     |
| H(13A)-C(13)-H(13B) | 109.5     |
| S(1)-C(13)-H(13C)   | 109.5     |
| H(13A)-C(13)-H(13C) | 109.5     |
| H(13B)-C(13)-H(13C) | 109.5     |
| N(3)-C(14)-S(2)     | 178.3(9)  |
| N(4)-C(15)-S(3)     | 175.3(10) |
| N(5)-C(16)-S(4)     | 178.6(10) |

---

Symmetry transformations used to generate equivalent atoms:

#1  $x-1/2, -y+5/2, -z+1$  #2  $-x, y+1/2, -z+3/2$  #3  $-x, y-1/2, -z+3/2$

#4  $x+1/2, -y+5/2, -z+1$

**Table S4.** Anisotropic displacement parameters ( $\text{\AA}^2 \times 10^3$ ) for  $[(L^1)\text{Cu}_2(\text{SCN})_3]_n$  (**1**) The anisotropic displacement factor exponent takes the form:  $-2\pi^2 [h^2 a^{*2} U^{11} + \dots + 2 h k a^* b^* U^{12}]$

|       | $U^{11}$ | $U^{22}$ | $U^{33}$ | $U^{23}$ | $U^{13}$ | $U^{12}$ |
|-------|----------|----------|----------|----------|----------|----------|
| Cu(1) | 60(1)    | 37(1)    | 37(1)    | 6(1)     | -1(1)    | 1(1)     |
| Cu(2) | 77(1)    | 86(1)    | 44(1)    | 11(1)    | 9(1)     | 26(1)    |
| S(1)  | 55(1)    | 48(1)    | 39(1)    | 5(1)     | 5(1)     | 5(1)     |
| S(2)  | 58(1)    | 46(1)    | 41(1)    | 2(1)     | -3(1)    | 1(1)     |
| S(3)  | 64(2)    | 70(2)    | 65(2)    | 2(1)     | -13(1)   | 7(1)     |
| S(4)  | 56(2)    | 50(1)    | 49(1)    | 0(1)     | 2(1)     | 5(1)     |
| N(1)  | 37(4)    | 45(4)    | 41(4)    | 1(3)     | 0(3)     | -7(3)    |
| N(2)  | 40(4)    | 43(4)    | 33(3)    | 2(3)     | 3(3)     | -3(3)    |
| N(3)  | 65(6)    | 73(5)    | 50(5)    | -4(4)    | 1(5)     | -13(5)   |
| N(4)  | 79(6)    | 20(3)    | 70(5)    | -8(3)    | 27(5)    | 3(4)     |
| N(5)  | 65(6)    | 74(6)    | 47(5)    | -9(4)    | 5(4)     | -22(4)   |
| C(1)  | 49(6)    | 36(4)    | 47(5)    | 10(4)    | -2(4)    | -5(4)    |
| C(2)  | 37(5)    | 41(4)    | 60(5)    | -6(4)    | -5(4)    | 4(4)     |
| C(3)  | 48(6)    | 51(5)    | 44(5)    | -5(4)    | -6(4)    | -2(4)    |
| C(4)  | 40(5)    | 57(5)    | 41(4)    | 7(4)     | -3(4)    | -3(5)    |
| C(5)  | 40(5)    | 38(4)    | 38(4)    | 3(3)     | -2(4)    | -2(4)    |
| C(6)  | 42(5)    | 42(4)    | 37(4)    | 11(4)    | -3(4)    | 14(5)    |
| C(7)  | 32(4)    | 32(4)    | 42(4)    | -4(3)    | 1(4)     | 2(4)     |
| C(8)  | 49(5)    | 42(5)    | 39(4)    | 8(4)     | -5(4)    | 5(4)     |
| C(9)  | 34(6)    | 48(5)    | 75(6)    | 21(5)    | -3(5)    | -3(4)    |
| C(10) | 44(6)    | 41(4)    | 72(6)    | -6(4)    | 1(5)     | 2(4)     |
| C(11) | 43(5)    | 46(5)    | 47(5)    | -6(4)    | 0(4)     | 7(4)     |
| C(12) | 38(5)    | 29(4)    | 48(5)    | 6(3)     | 7(4)     | 5(4)     |
| C(13) | 84(8)    | 87(7)    | 32(5)    | -7(5)    | -10(5)   | 20(7)    |
| C(14) | 43(5)    | 45(5)    | 37(5)    | -5(4)    | 4(4)     | -4(4)    |
| C(15) | 64(7)    | 68(7)    | 35(5)    | -1(5)    | 5(5)     | -32(6)   |
| C(16) | 56(7)    | 59(6)    | 34(5)    | -6(5)    | -5(4)    | -10(5)   |

**Table S5.** Hydrogen coordinates ( $\times 10^4$ ) and isotropic displacement parameters ( $\text{\AA}^2 \times 10^3$ ) for  $[(L^1)\text{Cu}_2(\text{SCN})_3]_n$  (**1**)

|        | x    | y     | z    | U(eq) |
|--------|------|-------|------|-------|
| H(1)   | 2108 | 9785  | 7099 | 53    |
| H(2)   | 2236 | 10496 | 8183 | 55    |
| H(3)   | 2732 | 9687  | 9193 | 57    |
| H(4)   | 2993 | 8181  | 9121 | 55    |
| H(6)   | 3068 | 6803  | 8329 | 49    |
| H(8)   | 2725 | 5420  | 8098 | 52    |
| H(9)   | 2506 | 4001  | 7700 | 63    |
| H(10)  | 2415 | 3688  | 6524 | 63    |
| H(11)  | 2573 | 4797  | 5706 | 54    |
| H(13A) | 1186 | 6986  | 4817 | 101   |
| H(13B) | -130 | 6565  | 5409 | 101   |
| H(13C) | 1240 | 5970  | 4944 | 101   |

**Table S6.** Crystal data and structure refinement for **2**

|                                   |                                                                                                                        |
|-----------------------------------|------------------------------------------------------------------------------------------------------------------------|
| Identification code               | purple_final                                                                                                           |
| Empirical formula                 | C <sub>14</sub> H <sub>11</sub> N <sub>3</sub> S <sub>2</sub>                                                          |
| Formula weight                    | 285.38                                                                                                                 |
| Temperature                       | 150(2) K                                                                                                               |
| Wavelength                        | 0.71073 Å                                                                                                              |
| Crystal system, space group       | Triclinic, P -1                                                                                                        |
| Unit cell dimensions              | a = 7.416(7) Å   a = 74.754(12) deg.<br>b = 8.040(7) Å   b = 79.687(12) deg.<br>c = 12.085(10) Å   g = 63.974(11) deg. |
| Volume                            | 623.1(9) Å <sup>3</sup>                                                                                                |
| Z, Calculated density             | 2, 1.521 Mg/m <sup>3</sup>                                                                                             |
| Absorption coefficient            | 0.414 mm <sup>-1</sup>                                                                                                 |
| F(000)                            | 296                                                                                                                    |
| Crystal size                      | 0.30 x 0.26 x 0.21 mm                                                                                                  |
| Theta range for data collection   | 1.75 to 24.05 deg.                                                                                                     |
| Limiting indices                  | -8<=h<=8, -9<=k<=9, -13<=l<=13                                                                                         |
| Reflections collected / unique    | 4047 / 1952 [R(int) = 0.0566]                                                                                          |
| Completeness to theta = 24.05     | 98.7 %                                                                                                                 |
| Refinement method                 | Full-matrix least-squares on F <sup>2</sup>                                                                            |
| Data / restraints / parameters    | 1952 / 0 / 172                                                                                                         |
| Goodness-of-fit on F <sup>2</sup> | 0.964                                                                                                                  |
| Final R indices [I>2sigma(I)]     | R1 = 0.0638, wR2 = 0.1516                                                                                              |
| R indices (all data)              | R1 = 0.0938, wR2 = 0.1704                                                                                              |
| Largest diff. peak and hole       | 0.669 and -0.393 e.Å <sup>-3</sup>                                                                                     |



**Table S7.** Atomic coordinates ( $\times 10^4$ ) and equivalent isotropic displacement parameters ( $\text{\AA}^2 \times 10^3$ ) for **2**  
U(eq) is defined as one third of the trace of the orthogonalized Uij tensor.

|       | x       | y       | z        | U(eq) |
|-------|---------|---------|----------|-------|
| C(13) | 1236(7) | 2407(7) | 4084(4)  | 34(1) |
| S(2)  | 3618(2) | 7695(2) | -3854(1) | 30(1) |
| S(1)  | 1720(2) | 2881(2) | 2549(1)  | 30(1) |
| N(1)  | 3556(5) | 4402(5) | -2515(3) | 23(1) |
| N(3)  | 2953(5) | 6675(5) | -1525(3) | 24(1) |
| C(6)  | 2800(6) | 5120(6) | -759(4)  | 26(1) |
| N(2)  | 2399(5) | 4746(5) | 336(3)   | 25(1) |
| C(11) | 1174(7) | 6270(6) | 3075(4)  | 31(1) |
| C(7)  | 1976(6) | 5972(6) | 1077(4)  | 24(1) |
| C(9)  | 1365(7) | 8871(7) | 1606(4)  | 32(1) |
| C(14) | 3349(7) | 6388(6) | -2583(4) | 24(1) |
| C(1)  | 3981(7) | 3485(6) | -3377(4) | 28(1) |
| C(8)  | 1842(7) | 7833(6) | 772(4)   | 29(1) |
| C(4)  | 3238(7) | 1858(6) | -1099(4) | 27(1) |
| C(2)  | 4057(7) | 1681(6) | -3097(4) | 28(1) |
| C(12) | 1610(6) | 5192(6) | 2237(4)  | 24(1) |
| C(5)  | 3195(7) | 3661(6) | -1413(4) | 26(1) |
| C(3)  | 3666(7) | 865(6)  | -1960(4) | 29(1) |
| C(10) | 1044(7) | 8098(7) | 2739(4)  | 33(1) |

**Table S8.** Bond lengths [Å] and angles [deg] for **2**

---

|                   |          |
|-------------------|----------|
| C(13)-S(1)        | 1.795(4) |
| S(2)-C(14)        | 1.651(5) |
| S(1)-C(12)        | 1.764(5) |
| N(1)-C(5)         | 1.340(6) |
| N(1)-C(1)         | 1.347(5) |
| N(1)-C(14)        | 1.516(5) |
| N(3)-C(14)        | 1.318(5) |
| N(3)-C(6)         | 1.383(6) |
| C(6)-N(2)         | 1.287(6) |
| C(6)-C(5)         | 1.480(6) |
| N(2)-C(7)         | 1.402(5) |
| C(11)-C(10)       | 1.382(6) |
| C(11)-C(12)       | 1.407(6) |
| C(7)-C(8)         | 1.406(6) |
| C(7)-C(12)        | 1.408(6) |
| C(9)-C(10)        | 1.373(7) |
| C(9)-C(8)         | 1.376(6) |
| C(1)-C(2)         | 1.378(6) |
| C(4)-C(3)         | 1.385(6) |
| C(4)-C(5)         | 1.386(6) |
| C(2)-C(3)         | 1.397(6) |
|                   |          |
| C(12)-S(1)-C(13)  | 103.1(2) |
| C(5)-N(1)-C(1)    | 123.6(4) |
| C(5)-N(1)-C(14)   | 108.0(3) |
| C(1)-N(1)-C(14)   | 128.4(4) |
| C(14)-N(3)-C(6)   | 110.5(4) |
| N(2)-C(6)-N(3)    | 133.6(4) |
| N(2)-C(6)-C(5)    | 118.2(4) |
| N(3)-C(6)-C(5)    | 108.2(4) |
| C(6)-N(2)-C(7)    | 125.4(4) |
| C(10)-C(11)-C(12) | 119.4(4) |
| N(2)-C(7)-C(8)    | 127.1(4) |
| N(2)-C(7)-C(12)   | 113.4(4) |
| C(8)-C(7)-C(12)   | 119.5(4) |
| C(10)-C(9)-C(8)   | 120.6(4) |
| N(3)-C(14)-N(1)   | 107.1(4) |
| N(3)-C(14)-S(2)   | 133.9(4) |
| N(1)-C(14)-S(2)   | 119.0(3) |
| N(1)-C(1)-C(2)    | 117.4(4) |
| C(9)-C(8)-C(7)    | 119.9(4) |
| C(3)-C(4)-C(5)    | 117.7(4) |
| C(1)-C(2)-C(3)    | 120.7(4) |
| C(11)-C(12)-C(7)  | 119.4(4) |
| C(11)-C(12)-S(1)  | 123.7(4) |
| C(7)-C(12)-S(1)   | 117.0(3) |
| N(1)-C(5)-C(4)    | 120.6(4) |
| N(1)-C(5)-C(6)    | 106.1(4) |
| C(4)-C(5)-C(6)    | 133.3(4) |
| C(4)-C(3)-C(2)    | 119.9(4) |
| C(9)-C(10)-C(11)  | 121.3(4) |

**Table S9.** Anisotropic displacement parameters ( $\text{\AA}^2 \times 10^3$ ) for **2**  
The anisotropic displacement factor exponent takes the form:  
 $-2 \pi^2 [h^2 a^{*2} U_{11} + \dots + 2 h k a^* b^* U_{12}]$

|       | U11   | U22   | U33   | U23    | U13   | U12    |
|-------|-------|-------|-------|--------|-------|--------|
| C(13) | 50(3) | 39(3) | 18(3) | -2(2)  | -4(2) | -24(3) |
| S(2)  | 45(1) | 26(1) | 24(1) | -4(1)  | -1(1) | -19(1) |
| S(1)  | 41(1) | 27(1) | 24(1) | -5(1)  | -1(1) | -17(1) |
| N(1)  | 28(2) | 23(2) | 21(2) | -5(2)  | 0(2)  | -15(2) |
| N(3)  | 28(2) | 21(2) | 23(2) | -3(2)  | -3(2) | -11(2) |
| C(6)  | 28(3) | 21(3) | 31(3) | -6(2)  | -3(2) | -12(2) |
| N(2)  | 36(2) | 23(2) | 18(2) | -3(2)  | -1(2) | -15(2) |
| C(11) | 34(3) | 30(3) | 29(3) | -6(2)  | -1(2) | -13(2) |
| C(7)  | 25(3) | 26(3) | 25(3) | -8(2)  | -3(2) | -10(2) |
| C(9)  | 44(3) | 26(3) | 34(3) | -8(2)  | -2(2) | -21(2) |
| C(14) | 27(3) | 23(2) | 24(3) | -5(2)  | -3(2) | -11(2) |
| C(1)  | 41(3) | 29(3) | 18(2) | -5(2)  | -1(2) | -18(2) |
| C(8)  | 35(3) | 26(3) | 26(3) | -5(2)  | 1(2)  | -15(2) |
| C(4)  | 36(3) | 23(3) | 25(3) | 0(2)   | -5(2) | -16(2) |
| C(2)  | 39(3) | 26(3) | 25(3) | -9(2)  | -3(2) | -16(2) |
| C(12) | 27(3) | 20(2) | 24(3) | -2(2)  | -2(2) | -11(2) |
| C(5)  | 30(3) | 28(3) | 24(3) | -6(2)  | 0(2)  | -16(2) |
| C(3)  | 38(3) | 22(2) | 33(3) | -6(2)  | -3(2) | -18(2) |
| C(10) | 35(3) | 38(3) | 32(3) | -17(2) | 3(2)  | -18(2) |

**Table S10.** Hydrogen coordinates ( $\times 10^4$ ) and isotropic displacement parameters ( $\text{\AA}^2 \times 10^3$ ) for **2**

|        | x    | y     | z     | U(eq) |
|--------|------|-------|-------|-------|
| H(13A) | 1266 | 1160  | 4342  | 51    |
| H(13B) | -64  | 3321  | 4292  | 51    |
| H(13C) | 2248 | 2486  | 4438  | 51    |
| H(11)  | 975  | 5757  | 3848  | 37    |
| H(9)   | 1258 | 10108 | 1400  | 39    |
| H(1)   | 4215 | 4048  | -4134 | 33    |
| H(8)   | 2075 | 8362  | 8     | 34    |
| H(4)   | 2988 | 1333  | -336  | 33    |
| H(2)   | 4371 | 999   | -3670 | 34    |
| H(3)   | 3693 | -343  | -1782 | 35    |
| H(10)  | 734  | 8818  | 3292  | 39    |

**Table S11.** Crystal data and structure refinement for **3**

|                                   |                                                                                                                       |
|-----------------------------------|-----------------------------------------------------------------------------------------------------------------------|
| Identification code               | sr9                                                                                                                   |
| Empirical formula                 | C <sub>3</sub> H <sub>3</sub> Cu N <sub>2</sub> S                                                                     |
| Formula weight                    | 162.67                                                                                                                |
| Temperature                       | 150(2) K                                                                                                              |
| Wavelength                        | 0.71073 Å                                                                                                             |
| Crystal system, space group       | Monoclinic, P2 <sub>1</sub> /c                                                                                        |
| Unit cell dimensions              | a = 6.648(10) Å    alpha = 90 deg.<br>b = 7.368(10) Å    beta = 105.08(3) deg.<br>c = 11.379(16) Å    gamma = 90 deg. |
| Volume                            | 538.2(13) Å <sup>3</sup>                                                                                              |
| Z, Calculated density             | 5, 2.510 Mg/m <sup>3</sup>                                                                                            |
| Absorption coefficient            | 5.377 mm <sup>-1</sup>                                                                                                |
| F(000)                            | 400                                                                                                                   |
| Crystal size                      | 0.15 x 0.11 x 0.13 mm                                                                                                 |
| Theta range for data collection   | 4.21 to 22.73 deg.                                                                                                    |
| Limiting indices                  | -7 ≤ h ≤ 7, -8 ≤ k ≤ 8, -11 ≤ l ≤ 12                                                                                  |
| Reflections collected / unique    | 2179 / 558 [R(int) = 0.1603]                                                                                          |
| Completeness to theta = 22.73     | 77.1 %                                                                                                                |
| Refinement method                 | Full-matrix least-squares on F <sup>2</sup>                                                                           |
| Data / restraints / parameters    | 558 / 0 / 64                                                                                                          |
| Goodness-of-fit on F <sup>2</sup> | 0.867                                                                                                                 |
| Final R indices [I > 2σ(I)]       | R1 = 0.0604, wR2 = 0.0901                                                                                             |
| R indices (all data)              | R1 = 0.1050, wR2 = 0.1006                                                                                             |
| Largest diff. peak and hole       | 0.461 and -0.325 e.Å <sup>-3</sup>                                                                                    |

**Table S12.** Atomic coordinates ( $\times 10^4$ ) and equivalent isotropic displacement parameters ( $\text{Å}^2 \times 10^3$ ) for **3**.

U(eq) is defined as one third of the trace of the orthogonalized  $U_{ij}$  tensor.

---

|       | x         | y        | z         | U(eq) |
|-------|-----------|----------|-----------|-------|
| N(2)  | 4567(12)  | 2579(12) | 7839(9)   | 53(2) |
| C(3)  | 3947(13)  | 3037(12) | 6848(9)   | 33(2) |
| C(1)  | 8779(15)  | 4376(14) | 11175(11) | 42(3) |
| C(2)  | 10254(14) | 5607(13) | 11975(10) | 52(3) |
| Cu(1) | 5632(2)   | 1802(2)  | 9497(1)   | 51(1) |
| S(1)  | 2825(4)   | 3818(3)  | 5444(2)   | 42(1) |
| N(1)  | 7623(12)  | 3405(13) | 10607(7)  | 45(2) |

---

**Table S13.** Bond lengths [Å] and angles [deg] for **3**.

---

|                      |            |
|----------------------|------------|
| N(2)-C(3)            | 1.145(11)  |
| N(2)-Cu(1)           | 1.923(10)  |
| C(3)-S(1)            | 1.680(10)  |
| C(1)-N(1)            | 1.123(11)  |
| C(1)-C(2)            | 1.466(14)  |
| Cu(1)-N(1)           | 1.967(9)   |
| Cu(1)-S(1)#1         | 2.420(4)   |
| Cu(1)-S(1)#2         | 2.428(4)   |
| S(1)-Cu(1)#3         | 2.420(4)   |
| S(1)-Cu(1)#4         | 2.428(4)   |
|                      |            |
| C(3)-N(2)-Cu(1)      | 179.4(8)   |
| N(2)-C(3)-S(1)       | 173.7(8)   |
| N(1)-C(1)-C(2)       | 176.8(13)  |
| N(2)-Cu(1)-N(1)      | 117.8(4)   |
| N(2)-Cu(1)-S(1)#1    | 110.1(3)   |
| N(1)-Cu(1)-S(1)#1    | 108.5(3)   |
| N(2)-Cu(1)-S(1)#2    | 111.2(2)   |
| N(1)-Cu(1)-S(1)#2    | 107.1(3)   |
| S(1)#1-Cu(1)-S(1)#2  | 100.70(11) |
| C(3)-S(1)-Cu(1)#3    | 101.8(3)   |
| C(3)-S(1)-Cu(1)#4    | 98.9(3)    |
| Cu(1)#3-S(1)-Cu(1)#4 | 79.30(11)  |
| C(1)-N(1)-Cu(1)      | 175.5(9)   |

---

Symmetry transformations used to generate equivalent atoms:

#1  $-x+1, y-1/2, -z+3/2$  #2  $x, -y+1/2, z+1/2$   
#3  $-x+1, y+1/2, -z+3/2$  #4  $x, -y+1/2, z-1/2$

**Table S14.** Anisotropic displacement parameters ( $\text{Å}^2 \times 10^3$ ) for **3**.

The anisotropic displacement factor exponent takes the form:

$$-2 \pi^2 [ h^2 a^{*2} U_{11} + \dots + 2 h k a^* b^* U_{12} ]$$

---

|       | U11   | U22   | U33   | U23    | U13    | U12   |
|-------|-------|-------|-------|--------|--------|-------|
| N(2)  | 57(6) | 62(7) | 47(7) | 11(5)  | 24(5)  | 0(5)  |
| C(3)  | 54(6) | 26(6) | 19(6) | 5(5)   | 12(5)  | -6(4) |
| C(1)  | 39(7) | 31(6) | 58(8) | -10(6) | 14(5)  | 2(5)  |
| C(2)  | 35(6) | 40(6) | 59(8) | 8(6)   | -27(5) | -9(4) |
| Cu(1) | 73(1) | 43(1) | 28(1) | 1(1)   | -6(1)  | -7(1) |
| S(1)  | 57(2) | 33(2) | 25(2) | 6(1)   | -8(1)  | -1(1) |
| N(1)  | 60(6) | 52(6) | 10(4) | -3(4)  | -14(4) | -2(4) |

---



**Table S15.** Crystal data and structure refinement for **4**.

|                                   |                                                                                                                                   |
|-----------------------------------|-----------------------------------------------------------------------------------------------------------------------------------|
| Identification code               | sr21                                                                                                                              |
| Empirical formula                 | C <sub>12</sub> H <sub>12</sub> Cl Cu N <sub>5</sub> S                                                                            |
| Formula weight                    | 357.32                                                                                                                            |
| Temperature                       | 293(2) K                                                                                                                          |
| Wavelength                        | 0.71073 Å                                                                                                                         |
| Crystal system, space group       | Triclinic, P $\bar{1}$                                                                                                            |
| Unit cell dimensions              | a = 6.950(2) Å    alpha = 89.315(10) deg.<br>b = 7.115(2) Å    beta = 83.557(9) deg.<br>c = 14.846(5) Å    gamma = 79.712(9) deg. |
| Volume                            | 717.7(4) Å <sup>3</sup>                                                                                                           |
| Z, Calculated density             | 2, 1.654 Mg/m <sup>3</sup>                                                                                                        |
| Absorption coefficient            | 1.849 mm <sup>-1</sup>                                                                                                            |
| F(000)                            | 362                                                                                                                               |
| Crystal size                      | 0.33 x 0.30 x 0.22 mm                                                                                                             |
| Theta range for data collection   | 1.38 to 24.68 deg.                                                                                                                |
| Limiting indices                  | -8 ≤ h ≤ 8, -8 ≤ k ≤ 8, -17 ≤ l ≤ 17                                                                                              |
| Reflections collected / unique    | 8141 / 2439 [R(int) = 0.0554]                                                                                                     |
| Completeness to theta = 24.68     | 99.7 %                                                                                                                            |
| Refinement method                 | Full-matrix least-squares on F <sup>2</sup>                                                                                       |
| Data / restraints / parameters    | 2439 / 0 / 238                                                                                                                    |
| Goodness-of-fit on F <sup>2</sup> | 1.037                                                                                                                             |
| Final R indices [I > 2σ(I)]       | R1 = 0.0405, wR2 = 0.0979                                                                                                         |
| R indices (all data)              | R1 = 0.0576, wR2 = 0.1054                                                                                                         |
| Largest diff. peak and hole       | 0.663 and -0.448 e.Å <sup>-3</sup>                                                                                                |

**Table S16.** Atomic coordinates ( $\times 10^4$ ) and equivalent isotropic displacement parameters ( $\text{\AA}^2 \times 10^3$ ) for **4**.

U(eq) is defined as one third of the trace of the orthogonalized  $U_{ij}$  tensor.

---

|       | x        | y        | z       | U(eq) |
|-------|----------|----------|---------|-------|
| Cu(1) | 2056(1)  | 7013(1)  | 7600(1) | 22(1) |
| S(1)  | 3051(2)  | 4773(2)  | 6400(1) | 23(1) |
| Cl(1) | 3290(2)  | 4844(2)  | 8780(1) | 34(1) |
| N(3)  | 4174(5)  | 8498(5)  | 7273(3) | 27(1) |
| N(4)  | 5281(6)  | 8161(5)  | 6635(3) | 31(1) |
| N(5)  | 6453(7)  | 7884(6)  | 5995(3) | 49(1) |
| C(7)  | -635(6)  | 4368(5)  | 7198(3) | 21(1) |
| C(12) | 1005(6)  | 3564(6)  | 6609(3) | 20(1) |
| C(10) | -601(7)  | 997(6)   | 6273(3) | 28(1) |
| C(9)  | -2243(7) | 1827(6)  | 6844(3) | 28(1) |
| C(11) | 1021(7)  | 1869(6)  | 6154(3) | 23(1) |
| C(8)  | -2242(6) | 3487(6)  | 7305(3) | 23(1) |
| N(2)  | -501(5)  | 6078(5)  | 7652(2) | 21(1) |
| C(6)  | -1897(7) | 7014(6)  | 8183(3) | 25(1) |
| C(5)  | -1538(6) | 8778(6)  | 8588(3) | 24(1) |
| C(1)  | 786(7)   | 10713(6) | 8693(3) | 26(1) |
| C(3)  | -2457(7) | 11651(6) | 9454(3) | 30(1) |
| C(4)  | -2952(7) | 10005(7) | 9115(3) | 29(1) |
| C(2)  | -564(7)  | 11984(6) | 9241(3) | 29(1) |
| N(1)  | 320(5)   | 9123(5)  | 8366(2) | 22(1) |
| C(13) | 2372(9)  | 6092(7)  | 5398(3) | 30(1) |

---

**Table S17.** Bond lengths [Å] and angles [deg] for **4**.

---

|                   |            |
|-------------------|------------|
| Cu(1)-N(3)        | 1.975(4)   |
| Cu(1)-N(2)        | 1.999(3)   |
| Cu(1)-N(1)        | 2.022(3)   |
| Cu(1)-S(1)        | 2.3634(13) |
| Cu(1)-Cl(1)       | 2.4468(14) |
| S(1)-C(12)        | 1.786(4)   |
| S(1)-C(13)        | 1.812(5)   |
| N(3)-N(4)         | 1.150(5)   |
| N(4)-N(5)         | 1.174(6)   |
| C(7)-C(8)         | 1.369(6)   |
| C(7)-C(12)        | 1.395(6)   |
| C(7)-N(2)         | 1.420(5)   |
| C(12)-C(11)       | 1.387(6)   |
| C(10)-C(11)       | 1.375(6)   |
| C(10)-C(9)        | 1.387(6)   |
| C(9)-C(8)         | 1.371(6)   |
| N(2)-C(6)         | 1.271(5)   |
| C(6)-C(5)         | 1.471(6)   |
| C(5)-N(1)         | 1.361(5)   |
| C(5)-C(4)         | 1.371(6)   |
| C(1)-N(1)         | 1.342(5)   |
| C(1)-C(2)         | 1.380(6)   |
| C(3)-C(2)         | 1.379(7)   |
| C(3)-C(4)         | 1.393(6)   |
|                   |            |
| N(3)-Cu(1)-N(2)   | 161.85(15) |
| N(3)-Cu(1)-N(1)   | 94.54(15)  |
| N(2)-Cu(1)-N(1)   | 80.65(13)  |
| N(3)-Cu(1)-S(1)   | 95.36(11)  |
| N(2)-Cu(1)-S(1)   | 84.04(10)  |
| N(1)-Cu(1)-S(1)   | 158.50(10) |
| N(3)-Cu(1)-Cl(1)  | 104.23(12) |
| N(2)-Cu(1)-Cl(1)  | 93.87(10)  |
| N(1)-Cu(1)-Cl(1)  | 100.64(10) |
| S(1)-Cu(1)-Cl(1)  | 95.35(5)   |
| C(12)-S(1)-C(13)  | 99.3(2)    |
| C(12)-S(1)-Cu(1)  | 96.19(14)  |
| C(13)-S(1)-Cu(1)  | 104.41(18) |
| N(4)-N(3)-Cu(1)   | 122.2(3)   |
| N(3)-N(4)-N(5)    | 176.9(4)   |
| C(8)-C(7)-C(12)   | 119.2(4)   |
| C(8)-C(7)-N(2)    | 124.4(4)   |
| C(12)-C(7)-N(2)   | 116.4(4)   |
| C(11)-C(12)-C(7)  | 120.3(4)   |
| C(11)-C(12)-S(1)  | 119.7(3)   |
| C(7)-C(12)-S(1)   | 119.9(3)   |
| C(11)-C(10)-C(9)  | 119.6(4)   |
| C(8)-C(9)-C(10)   | 120.5(4)   |
| C(10)-C(11)-C(12) | 119.8(4)   |
| C(7)-C(8)-C(9)    | 120.7(4)   |
| C(6)-N(2)-C(7)    | 123.7(4)   |
| C(6)-N(2)-Cu(1)   | 115.0(3)   |

|                 |          |
|-----------------|----------|
| C(7)-N(2)-Cu(1) | 120.9(3) |
| N(2)-C(6)-C(5)  | 117.1(4) |
| N(1)-C(5)-C(4)  | 122.7(4) |
| N(1)-C(5)-C(6)  | 113.8(4) |
| C(4)-C(5)-C(6)  | 123.5(4) |
| N(1)-C(1)-C(2)  | 121.7(4) |
| C(2)-C(3)-C(4)  | 118.6(4) |
| C(5)-C(4)-C(3)  | 118.7(5) |
| C(3)-C(2)-C(1)  | 120.0(4) |
| C(1)-N(1)-C(5)  | 118.3(4) |
| C(1)-N(1)-Cu(1) | 128.9(3) |
| C(5)-N(1)-Cu(1) | 112.8(3) |

---

Symmetry transformations used to generate equivalent atoms:

**Table S18.** Anisotropic displacement parameters ( $\text{\AA}^2 \times 10^3$ ) for **4**.

The anisotropic displacement factor exponent takes the form:

$$-2 \pi^2 [ h^2 a^{*2} U_{11} + \dots + 2 h k a^* b^* U_{12} ]$$

---

|       | U11   | U22   | U33   | U23    | U13    | U12    |
|-------|-------|-------|-------|--------|--------|--------|
| Cu(1) | 16(1) | 27(1) | 24(1) | -6(1)  | -1(1)  | -6(1)  |
| S(1)  | 18(1) | 28(1) | 24(1) | -4(1)  | -1(1)  | -6(1)  |
| Cl(1) | 26(1) | 39(1) | 37(1) | -6(1)  | -6(1)  | -2(1)  |
| N(3)  | 24(2) | 32(2) | 28(2) | -9(2)  | 0(2)   | -13(2) |
| N(4)  | 33(2) | 26(2) | 39(3) | -1(2)  | -10(2) | -18(2) |
| N(5)  | 50(3) | 58(3) | 46(3) | -16(2) | 9(2)   | -32(2) |
| C(7)  | 21(2) | 19(2) | 23(2) | -1(2)  | -7(2)  | -2(2)  |
| C(12) | 20(2) | 23(2) | 20(2) | 5(2)   | -4(2)  | -7(2)  |
| C(10) | 33(3) | 23(2) | 30(3) | -1(2)  | -9(2)  | -6(2)  |
| C(9)  | 26(3) | 30(2) | 33(3) | 3(2)   | -7(2)  | -13(2) |
| C(11) | 20(2) | 23(2) | 25(3) | -3(2)  | -1(2)  | 0(2)   |
| C(8)  | 16(2) | 24(2) | 26(3) | 0(2)   | -2(2)  | 1(2)   |
| N(2)  | 15(2) | 24(2) | 21(2) | -4(2)  | -2(2)  | -2(1)  |
| C(6)  | 18(2) | 31(2) | 25(3) | 2(2)   | 1(2)   | -3(2)  |
| C(5)  | 22(2) | 28(2) | 23(3) | -2(2)  | -5(2)  | -3(2)  |
| C(1)  | 29(3) | 23(2) | 28(3) | -2(2)  | -6(2)  | -5(2)  |
| C(3)  | 36(3) | 30(2) | 21(3) | -6(2)  | -2(2)  | 4(2)   |
| C(4)  | 23(3) | 36(3) | 26(3) | -4(2)  | -1(2)  | -1(2)  |
| C(2)  | 39(3) | 22(2) | 26(3) | 0(2)   | -10(2) | -4(2)  |
| N(1)  | 20(2) | 26(2) | 20(2) | -3(2)  | -3(2)  | -3(2)  |
| C(13) | 34(3) | 32(3) | 24(3) | -5(2)  | -4(2)  | -11(3) |

---

**Table S19.** Hydrogen coordinates ( $\times 10^4$ ) and isotropic displacement parameters ( $\text{Å}^2 \times 10^3$ ) for **4**.

---

|       | x         | y         | z        | U(eq)  |
|-------|-----------|-----------|----------|--------|
| H(7)  | -3070(60) | 6740(50)  | 8370(30) | 11(10) |
| H(5)  | -3270(60) | 3960(50)  | 7660(20) | 7(10)  |
| H(4)  | -3360(60) | 1380(50)  | 6900(20) | 9(10)  |
| H(8)  | -340(60)  | 13190(60) | 9420(30) | 28(12) |
| H(2)  | 1940(60)  | 1360(50)  | 5830(30) | 8(11)  |
| H(6)  | -4080(70) | 9670(60)  | 9270(30) | 22(12) |
| H(3)  | -600(70)  | -90(70)   | 5930(30) | 39(13) |
| H(9)  | 2080(70)  | 10970(60) | 8470(30) | 28(12) |
| H(10) | -3350(70) | 12570(60) | 9820(30) | 33(12) |
| H(13) | 2390(60)  | 5320(60)  | 4910(30) | 25(12) |
| H(14) | 1200(80)  | 6600(70)  | 5480(30) | 45(17) |
| H(15) | 3200(70)  | 6840(60)  | 5310(30) | 34(14) |

---

**Table S20.** Torsion angles [deg] for **4**.

---

|                        |             |
|------------------------|-------------|
| N(3)-Cu(1)-S(1)-C(12)  | -174.19(17) |
| N(2)-Cu(1)-S(1)-C(12)  | -12.42(16)  |
| N(1)-Cu(1)-S(1)-C(12)  | -57.1(3)    |
| Cl(1)-Cu(1)-S(1)-C(12) | 80.93(13)   |
| N(3)-Cu(1)-S(1)-C(13)  | -72.9(2)    |
| N(2)-Cu(1)-S(1)-C(13)  | 88.9(2)     |
| N(1)-Cu(1)-S(1)-C(13)  | 44.2(3)     |
| Cl(1)-Cu(1)-S(1)-C(13) | -177.8(2)   |
| N(2)-Cu(1)-N(3)-N(4)   | -83.2(6)    |
| N(1)-Cu(1)-N(3)-N(4)   | -156.9(4)   |
| S(1)-Cu(1)-N(3)-N(4)   | 4.0(4)      |
| Cl(1)-Cu(1)-N(3)-N(4)  | 100.9(4)    |
| Cu(1)-N(3)-N(4)-N(5)   | -178(100)   |
| C(8)-C(7)-C(12)-C(11)  | -1.5(6)     |
| N(2)-C(7)-C(12)-C(11)  | 178.4(4)    |
| C(8)-C(7)-C(12)-S(1)   | 175.7(3)    |
| N(2)-C(7)-C(12)-S(1)   | -4.3(5)     |
| C(13)-S(1)-C(12)-C(11) | 84.1(4)     |
| Cu(1)-S(1)-C(12)-C(11) | -170.1(3)   |
| C(13)-S(1)-C(12)-C(7)  | -93.2(4)    |
| Cu(1)-S(1)-C(12)-C(7)  | 12.6(3)     |
| C(11)-C(10)-C(9)-C(8)  | -1.3(7)     |
| C(9)-C(10)-C(11)-C(12) | 0.3(7)      |
| C(7)-C(12)-C(11)-C(10) | 1.2(6)      |
| S(1)-C(12)-C(11)-C(10) | -176.1(3)   |
| C(12)-C(7)-C(8)-C(9)   | 0.5(6)      |
| N(2)-C(7)-C(8)-C(9)    | -179.5(4)   |
| C(10)-C(9)-C(8)-C(7)   | 1.0(7)      |
| C(8)-C(7)-N(2)-C(6)    | -2.7(6)     |
| C(12)-C(7)-N(2)-C(6)   | 177.3(4)    |
| C(8)-C(7)-N(2)-Cu(1)   | 170.2(3)    |
| C(12)-C(7)-N(2)-Cu(1)  | -9.8(5)     |
| N(3)-Cu(1)-N(2)-C(6)   | -83.2(6)    |
| N(1)-Cu(1)-N(2)-C(6)   | -7.4(3)     |
| S(1)-Cu(1)-N(2)-C(6)   | -172.2(3)   |
| Cl(1)-Cu(1)-N(2)-C(6)  | 92.8(3)     |
| N(3)-Cu(1)-N(2)-C(7)   | 103.3(5)    |
| N(1)-Cu(1)-N(2)-C(7)   | 179.1(3)    |
| S(1)-Cu(1)-N(2)-C(7)   | 14.3(3)     |
| Cl(1)-Cu(1)-N(2)-C(7)  | -80.7(3)    |
| C(7)-N(2)-C(6)-C(5)    | -178.9(3)   |
| Cu(1)-N(2)-C(6)-C(5)   | 7.8(5)      |
| N(2)-C(6)-C(5)-N(1)    | -3.0(6)     |
| N(2)-C(6)-C(5)-C(4)    | 174.8(4)    |
| N(1)-C(5)-C(4)-C(3)    | -1.4(7)     |
| C(6)-C(5)-C(4)-C(3)    | -179.1(4)   |
| C(2)-C(3)-C(4)-C(5)    | 0.3(7)      |
| C(4)-C(3)-C(2)-C(1)    | 0.9(7)      |
| N(1)-C(1)-C(2)-C(3)    | -1.1(7)     |
| C(2)-C(1)-N(1)-C(5)    | 0.0(6)      |
| C(2)-C(1)-N(1)-Cu(1)   | -177.2(3)   |
| C(4)-C(5)-N(1)-C(1)    | 1.3(6)      |

|                       |           |
|-----------------------|-----------|
| C(6)-C(5)-N(1)-C(1)   | 179.2(4)  |
| C(4)-C(5)-N(1)-Cu(1)  | 178.9(3)  |
| C(6)-C(5)-N(1)-Cu(1)  | -3.2(4)   |
| N(3)-Cu(1)-N(1)-C(1)  | -14.8(4)  |
| N(2)-Cu(1)-N(1)-C(1)  | -177.2(4) |
| S(1)-Cu(1)-N(1)-C(1)  | -132.0(3) |
| Cl(1)-Cu(1)-N(1)-C(1) | 90.6(4)   |
| N(3)-Cu(1)-N(1)-C(5)  | 167.8(3)  |
| N(2)-Cu(1)-N(1)-C(5)  | 5.5(3)    |
| S(1)-Cu(1)-N(1)-C(5)  | 50.6(5)   |
| Cl(1)-Cu(1)-N(1)-C(5) | -86.7(3)  |

---

Symmetry transformations used to generate equivalent atoms:



**Table S21.** Crystal data and structure refinement for **5**.

|                                   |                                                                                                                         |
|-----------------------------------|-------------------------------------------------------------------------------------------------------------------------|
| Identification code               | sr24                                                                                                                    |
| Empirical formula                 | C <sub>3.50</sub> H <sub>3</sub> CuN <sub>1.50</sub> S                                                                  |
| Formula weight                    | 161.67                                                                                                                  |
| Temperature                       | 293(2) K                                                                                                                |
| Wavelength                        | 0.71073 Å                                                                                                               |
| Crystal system, space group       | Monoclinic, P 2 <sub>1</sub> /c                                                                                         |
| Unit cell dimensions              | a = 9.9433(8) Å    alpha = 90 deg.<br>b = 10.6557(8) Å    beta = 90.237(2) deg.<br>c = 14.4837(11) Å    gamma = 90 deg. |
| Volume                            | 1534.6(2) Å <sup>3</sup>                                                                                                |
| Z, Calculated density             | 4, 0.700 Mg/m <sup>3</sup>                                                                                              |
| Absorption coefficient            | 1.508 mm <sup>-1</sup>                                                                                                  |
| F(000)                            | 318                                                                                                                     |
| Crystal size                      | 0.14 x 0.12 x 0.10 mm                                                                                                   |
| Theta range for data collection   | 2.05 to 20.09 deg.                                                                                                      |
| Limiting indices                  | -9<=h<=9, -8<=k<=10, -13<=l<=14                                                                                         |
| Reflections collected / unique    | 10735 / 1450 [R(int) = 0.0893]                                                                                          |
| Completeness to theta = 20.09     | 99.9 %                                                                                                                  |
| Refinement method                 | Full-matrix least-squares on F <sup>2</sup>                                                                             |
| Data / restraints / parameters    | 1450 / 0 / 209                                                                                                          |
| Goodness-of-fit on F <sup>2</sup> | 1.043                                                                                                                   |
| Final R indices [I>2sigma(I)]     | R1 = 0.0395, wR2 = 0.0859                                                                                               |
| R indices (all data)              | R1 = 0.0584, wR2 = 0.0939                                                                                               |
| Largest diff. peak and hole       | 0.319 and -0.421 e.Å <sup>-3</sup>                                                                                      |

**Table S22.** Atomic coordinates ( $\times 10^4$ ) and equivalent isotropic displacement parameters ( $\text{\AA}^2 \times 10^3$ ) for **5**.

U(eq) is defined as one third of the trace of the orthogonalized  $U_{ij}$  tensor.

|       | x        | y       | z       | U(eq) |
|-------|----------|---------|---------|-------|
| N(6)  | 7812(6)  | 2749(6) | 5171(4) | 19(2) |
| C(14) | 7079(9)  | 3109(7) | 4740(6) | 21(2) |
| S(3)  | 5885(2)  | 3698(2) | 4013(2) | 42(1) |
| Cu(1) | 8996(1)  | 2474(1) | 6387(1) | 19(1) |
| S(1)  | 7558(2)  | 3548(2) | 7443(1) | 21(1) |
| C(12) | 7971(7)  | 5082(6) | 7044(4) | 14(2) |
| C(7)  | 9194(6)  | 5262(6) | 6596(4) | 13(2) |
| C(8)  | 9614(7)  | 6463(7) | 6369(5) | 21(2) |
| C(11) | 7147(7)  | 6092(7) | 7226(5) | 21(2) |
| C(10) | 7558(7)  | 7285(7) | 6975(5) | 21(2) |
| C(9)  | 8789(7)  | 7454(7) | 6565(4) | 20(2) |
| N(2)  | 9912(6)  | 4152(5) | 6368(4) | 17(1) |
| C(6)  | 11144(7) | 4129(7) | 6107(5) | 20(2) |
| C(4)  | 12995(7) | 2774(7) | 5520(5) | 21(2) |
| C(2)  | 12582(7) | 576(7)  | 5430(5) | 24(2) |
| C(3)  | 13445(7) | 1570(7) | 5306(5) | 22(2) |
| C(1)  | 11292(7) | 805(7)  | 5752(4) | 17(2) |
| C(5)  | 11703(7) | 2913(6) | 5845(5) | 18(2) |
| N(1)  | 10848(6) | 1946(5) | 5961(4) | 17(2) |
| N(5)  | 6074(7)  | 260(6)  | 6563(4) | 29(2) |
| N(3)  | 8401(6)  | 764(5)  | 6707(4) | 22(2) |
| N(4)  | 7214(8)  | 534(5)  | 6632(4) | 25(2) |
| C(13) | 5850(7)  | 3402(7) | 7019(5) | 32(2) |

**Table S23.** Bond lengths [Å] and angles [deg] for **5**.

---

|                   |            |
|-------------------|------------|
| N(6)-C(14)        | 1.031(8)   |
| N(6)-Cu(1)        | 2.135(7)   |
| C(14)-S(3)        | 1.703(10)  |
| Cu(1)-N(3)        | 1.971(6)   |
| Cu(1)-N(2)        | 2.007(5)   |
| Cu(1)-N(1)        | 2.025(6)   |
| Cu(1)-S(1)        | 2.3895(19) |
| S(1)-C(12)        | 1.782(7)   |
| S(1)-C(13)        | 1.810(7)   |
| C(12)-C(11)       | 1.379(9)   |
| C(12)-C(7)        | 1.394(9)   |
| C(7)-C(8)         | 1.387(9)   |
| C(7)-N(2)         | 1.421(8)   |
| C(8)-C(9)         | 1.368(9)   |
| C(11)-C(10)       | 1.384(9)   |
| C(10)-C(9)        | 1.375(9)   |
| N(2)-C(6)         | 1.283(8)   |
| C(6)-C(5)         | 1.461(9)   |
| C(4)-C(5)         | 1.378(9)   |
| C(4)-C(3)         | 1.394(10)  |
| C(2)-C(3)         | 1.375(9)   |
| C(2)-C(1)         | 1.389(9)   |
| C(1)-N(1)         | 1.329(8)   |
| C(5)-N(1)         | 1.347(8)   |
| N(5)-N(4)         | 1.175(9)   |
| N(3)-N(4)         | 1.209(8)   |
|                   |            |
| C(14)-N(6)-Cu(1)  | 159.4(7)   |
| N(6)-C(14)-S(3)   | 179.1(9)   |
| N(3)-Cu(1)-N(2)   | 164.4(2)   |
| N(3)-Cu(1)-N(1)   | 95.1(2)    |
| N(2)-Cu(1)-N(1)   | 80.2(2)    |
| N(3)-Cu(1)-N(6)   | 99.0(2)    |
| N(2)-Cu(1)-N(6)   | 96.6(2)    |
| N(1)-Cu(1)-N(6)   | 106.6(2)   |
| N(3)-Cu(1)-S(1)   | 96.41(18)  |
| N(2)-Cu(1)-S(1)   | 81.67(17)  |
| N(1)-Cu(1)-S(1)   | 151.11(17) |
| N(6)-Cu(1)-S(1)   | 97.64(17)  |
| C(12)-S(1)-C(13)  | 100.8(3)   |
| C(12)-S(1)-Cu(1)  | 95.3(2)    |
| C(13)-S(1)-Cu(1)  | 107.7(2)   |
| C(11)-C(12)-C(7)  | 120.2(6)   |
| C(11)-C(12)-S(1)  | 121.0(5)   |
| C(7)-C(12)-S(1)   | 118.7(5)   |
| C(8)-C(7)-C(12)   | 120.1(6)   |
| C(8)-C(7)-N(2)    | 124.1(6)   |
| C(12)-C(7)-N(2)   | 115.7(6)   |
| C(9)-C(8)-C(7)    | 118.8(7)   |
| C(12)-C(11)-C(10) | 119.3(6)   |
| C(9)-C(10)-C(11)  | 119.9(7)   |
| C(8)-C(9)-C(10)   | 121.6(7)   |

|                 |          |
|-----------------|----------|
| C(6)-N(2)-C(7)  | 124.4(6) |
| C(6)-N(2)-Cu(1) | 114.9(5) |
| C(7)-N(2)-Cu(1) | 120.6(4) |
| N(2)-C(6)-C(5)  | 117.2(6) |
| C(5)-C(4)-C(3)  | 118.3(6) |
| C(3)-C(2)-C(1)  | 119.1(7) |
| C(2)-C(3)-C(4)  | 118.6(6) |
| N(1)-C(1)-C(2)  | 123.1(7) |
| N(1)-C(5)-C(4)  | 123.4(6) |
| N(1)-C(5)-C(6)  | 113.9(6) |
| C(4)-C(5)-C(6)  | 122.7(7) |
| C(1)-N(1)-C(5)  | 117.5(6) |
| C(1)-N(1)-Cu(1) | 128.9(5) |
| C(5)-N(1)-Cu(1) | 113.6(4) |
| N(4)-N(3)-Cu(1) | 117.4(5) |
| N(5)-N(4)-N(3)  | 177.3(7) |

---

Symmetry transformations used to generate equivalent atoms:

**Table S24.** Anisotropic displacement parameters ( $\text{Å}^2 \times 10^3$ ) for **5**.  
The anisotropic displacement factor exponent takes the form:  
 $-2 \pi^2 [ h^2 a^{*2} U_{11} + \dots + 2 h k a^* b^* U_{12} ]$

|       | U11   | U22   | U33   | U23   | U13   | U12    |
|-------|-------|-------|-------|-------|-------|--------|
| N(6)  | 24(4) | 10(4) | 22(4) | -4(3) | 6(3)  | -8(3)  |
| C(14) | 31(6) | 8(5)  | 25(6) | -7(4) | 18(5) | -15(4) |
| S(3)  | 39(1) | 39(2) | 48(2) | 5(1)  | -6(1) | 3(1)   |
| Cu(1) | 19(1) | 10(1) | 27(1) | 0(1)  | 1(1)  | -1(1)  |
| S(1)  | 24(1) | 11(1) | 27(1) | 2(1)  | 5(1)  | -2(1)  |
| C(12) | 17(4) | 9(4)  | 15(4) | -3(3) | -7(4) | 1(4)   |
| C(7)  | 12(4) | 11(5) | 16(4) | -2(3) | -2(4) | 5(4)   |
| C(8)  | 23(4) | 15(5) | 24(5) | -5(4) | -1(4) | -2(4)  |
| C(11) | 24(5) | 20(5) | 20(4) | 0(4)  | -3(4) | -5(4)  |
| C(10) | 20(4) | 21(5) | 21(4) | -1(4) | -3(4) | 6(4)   |
| C(9)  | 30(5) | 6(4)  | 22(4) | 4(4)  | -7(4) | 0(4)   |
| N(2)  | 17(4) | 15(4) | 18(4) | 0(3)  | -1(3) | -1(3)  |
| C(6)  | 22(5) | 14(5) | 24(5) | -1(4) | -1(4) | -9(4)  |
| C(4)  | 15(5) | 23(5) | 25(5) | 5(4)  | -3(4) | -3(4)  |
| C(2)  | 34(5) | 11(5) | 26(5) | 5(4)  | 0(4)  | 2(4)   |
| C(3)  | 23(5) | 22(5) | 21(4) | 1(4)  | -1(4) | 9(4)   |
| C(1)  | 22(5) | 18(5) | 10(4) | 3(3)  | -5(4) | -4(4)  |
| C(5)  | 22(5) | 10(5) | 21(5) | 2(3)  | -3(4) | -1(4)  |
| N(1)  | 22(4) | 5(4)  | 24(4) | -2(3) | -4(3) | 1(3)   |
| N(5)  | 27(4) | 18(4) | 41(4) | -2(3) | 12(4) | -4(3)  |
| N(3)  | 15(4) | 7(4)  | 44(4) | -3(3) | -3(3) | 0(3)   |
| N(4)  | 46(5) | 8(4)  | 22(4) | 1(3)  | 9(4)  | 2(4)   |
| C(13) | 21(5) | 16(5) | 58(6) | -6(4) | 13(4) | -3(4)  |

**Table S25.** Hydrogen coordinates ( $\times 10^4$ ) and isotropic displacement parameters ( $\text{\AA}^2 \times 10^3$ ) for **5**.

---

|        | x     | y    | z    | U(eq) |
|--------|-------|------|------|-------|
| H(5)   | 10442 | 6593 | 6088 | 25    |
| H(2)   | 6323  | 5973 | 7515 | 25    |
| H(3)   | 7003  | 7971 | 7084 | 25    |
| H(4)   | 9068  | 8263 | 6417 | 24    |
| H(7)   | 11659 | 4857 | 6086 | 24    |
| H(9)   | 13554 | 3467 | 5446 | 25    |
| H(11)  | 12860 | -238 | 5300 | 28    |
| H(10)  | 14310 | 1442 | 5083 | 27    |
| H(12)  | 10711 | 128  | 5824 | 20    |
| H(14A) | 5262  | 3901 | 7393 | 48    |
| H(14B) | 5576  | 2539 | 7048 | 48    |
| H(14C) | 5805  | 3687 | 6391 | 48    |

---
